# Supplementary material for: Is Pbam-32 thermodynamically stable compared with diamond and graphite under variable pressure and temperature conditions?
Source: Royal Society of Chemistry journal article supplement (doi:10.1039/d2cp04178b), 2022-01-01
Supplement: d2cp04178b1.pdf [file d2cp04178b1.pdf]

## Supporting Information:

### Is Pbam-32 thermodynamic stable comparing with diamond and graphite under variable P-T conditions?

Jiao Zhang<sup>1,2</sup>, Yuan Chang<sup>3</sup>, Hongsheng Liu<sup>3</sup>, Mengke Li<sup>1\*</sup>, Junfeng Gao<sup>3\*</sup>

*1. School of Physics and Electronic Technology, Liaoning Normal University, Dalian, 116029,*

*China*

*2. Basic Department, Shenyang Institute of Engineering, Shenyang, 110136, China*

*3. Key laboratory of Material Modification by Laser, Ion and Electron Beams (Dalian*

*University of Technology), Ministry of Education, Dalian, 116024, China*

\*Email: gaojf@dlut.edu.cn; limk@dlut.edu.cn

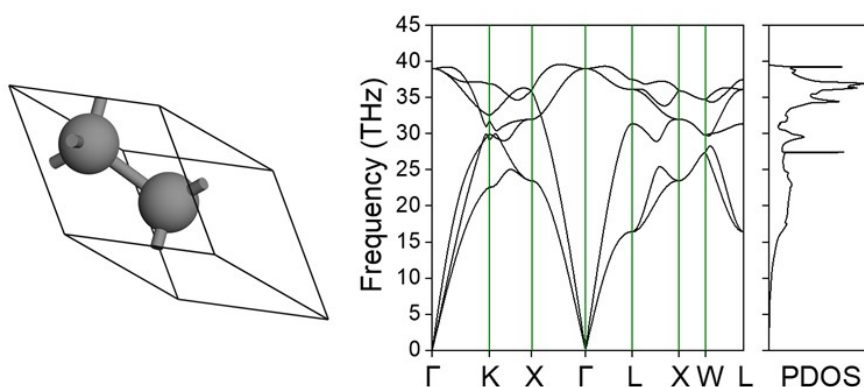

**Fig. S1** Structures and phonon dispersion of diamond. High symmetric points in the first Brillouin Zone:

$\Gamma(0, 0, 0)$ ,  $K(0.375, 0.375, 0.75)$ ,  $X(0.5, 0, 0.5)$ ,  $\Gamma(0, 0, 0)$ ,  $L(0.5, 0.5, 0.5)$ ,  $X(0.5, 0, 0.5)$ ,  $W(0.5, 0.25, 0.75)$ ,  $L(0.5, 0.5, 0.5)$ .

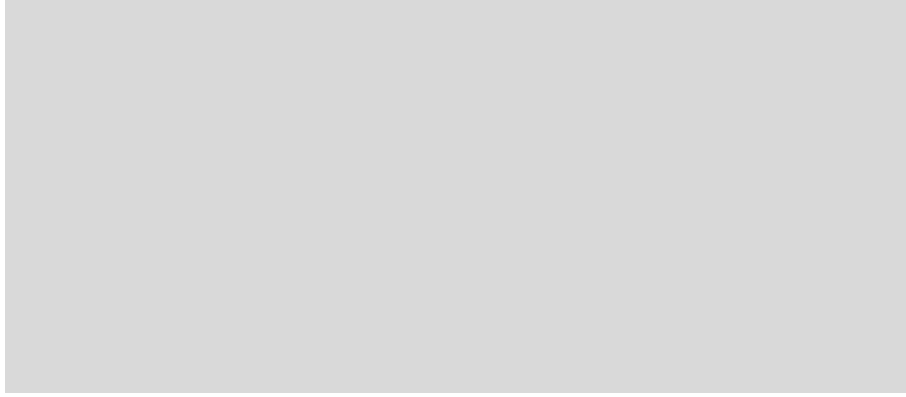

**Fig. S2** Structures and phonon dispersion of graphite. High symmetric points in the first Brillouin Zone:

$\Gamma(0, 0, 0)$ ,  $K(-0.333, 0.667, 0)$ ,  $M(0, 0.5, 0)$ ,  $\Gamma(0, 0, 0)$ .

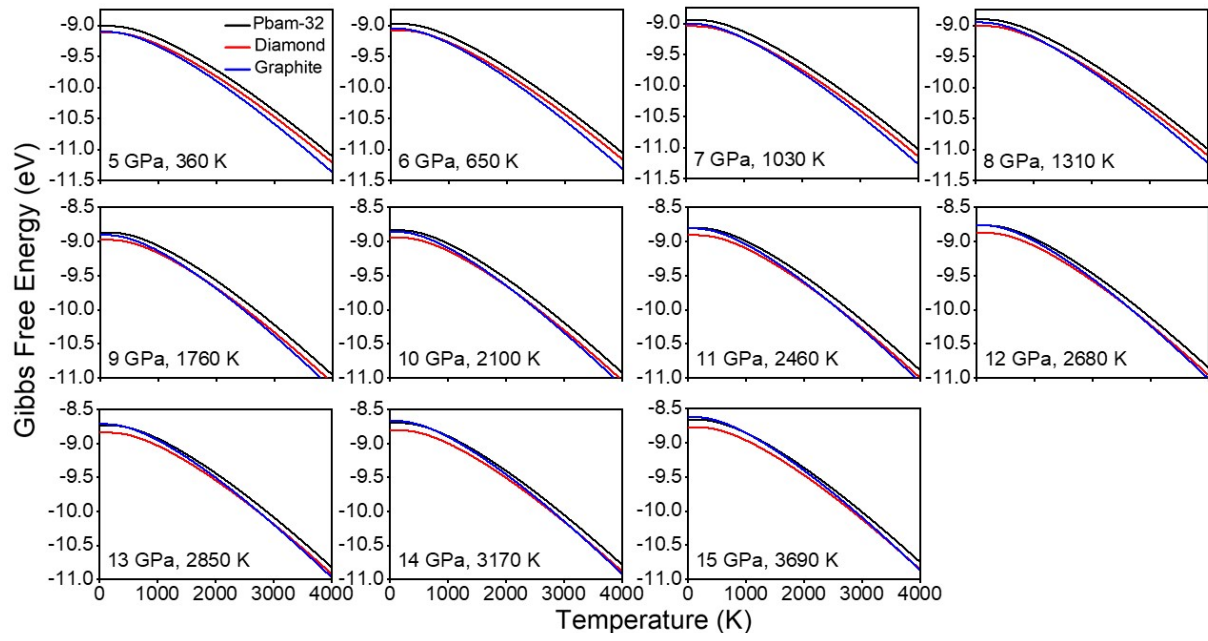

**Fig. S3** Gibbs free energies of Pbam-32, diamond and graphite under 5 ~ 15 GPa pressure.

**Table S1.** Lattice parameters of Pbam-32, diamond and graphite.

| Configuration | a (Å) | b (Å) | c (Å) | $\alpha$ (°) | $\beta$ (°) | $\gamma$ (°) |
|---------------|-------|-------|-------|--------------|-------------|--------------|
| Pbam-32       | 8.303 | 8.865 | 2.511 | 90           | 90          | 90           |
| Diamond       | 2.515 | 2.515 | 2.515 | 60           | 60          | 60           |
| Graphite      | 2.467 | 2.467 | 6.709 | 90           | 90          | 120          |

**Table S2.** Bonds and their fractions in Pbam-32.

| Bond                           | Length (Å) | Fraction |
|--------------------------------|------------|----------|
| C <sub>1</sub> -C <sub>1</sub> | 1.580      | 2/64     |
| C <sub>1</sub> -C <sub>2</sub> | 1.528      | 8/64     |
| C <sub>1</sub> -C <sub>8</sub> | 1.559      | 4/64     |
| C <sub>2</sub> -C <sub>3</sub> | 1.541      | 4/64     |
| C <sub>2</sub> -C <sub>6</sub> | 1.574      | 4/64     |
| C <sub>3</sub> -C <sub>4</sub> | 1.524      | 8/64     |
| C <sub>3</sub> -C <sub>5</sub> | 1.545      | 4/64     |
| C <sub>4</sub> -C <sub>4</sub> | 1.456      | 2/64     |
| C <sub>4</sub> -C <sub>7</sub> | 1.543      | 4/64     |
| C <sub>5</sub> -C <sub>6</sub> | 1.503      | 4/64     |
| C <sub>5</sub> -C <sub>8</sub> | 1.554      | 8/64     |
| C <sub>6</sub> -C <sub>7</sub> | 1.541      | 8/64     |
| C <sub>7</sub> -C <sub>8</sub> | 1.566      | 4/64     |

**Table S3.** Angles and their fractions in Pbam-32.

| Angle                                          | Degree (°) | Fraction |
|------------------------------------------------|------------|----------|
| C <sub>2</sub> -C <sub>1</sub> -C <sub>2</sub> | 110.235    | 4/144    |
| C <sub>2</sub> -C <sub>1</sub> -C <sub>8</sub> | 110.054    | 8/144    |
| C <sub>1</sub> -C <sub>1</sub> -C <sub>8</sub> | 111.267    | 4/144    |
| C <sub>1</sub> -C <sub>1</sub> -C <sub>2</sub> | 107.586    | 8/144    |
| C <sub>1</sub> -C <sub>2</sub> -C <sub>3</sub> | 116.126    | 4/144    |
| C <sub>1</sub> -C <sub>2</sub> -C <sub>6</sub> | 109.902    | 4/144    |
| C <sub>3</sub> -C <sub>2</sub> -C <sub>6</sub> | 93.120     | 4/144    |
| C <sub>2</sub> -C <sub>3</sub> -C <sub>4</sub> | 99.260     | 4/144    |
| C <sub>2</sub> -C <sub>3</sub> -C <sub>5</sub> | 129.683    | 4/144    |

---

|                                                |         |       |
|------------------------------------------------|---------|-------|
| C <sub>4</sub> -C <sub>3</sub> -C <sub>5</sub> | 108.481 | 4/144 |
| C <sub>3</sub> -C <sub>4</sub> -C <sub>4</sub> | 110.017 | 8/144 |
| C <sub>3</sub> -C <sub>4</sub> -C <sub>3</sub> | 110.689 | 4/144 |
| C <sub>3</sub> -C <sub>4</sub> -C <sub>7</sub> | 106.583 | 8/144 |
| C <sub>4</sub> -C <sub>4</sub> -C <sub>7</sub> | 112.863 | 4/144 |
| C <sub>3</sub> -C <sub>5</sub> -C <sub>6</sub> | 108.243 | 4/144 |
| C <sub>3</sub> -C <sub>5</sub> -C <sub>8</sub> | 110.789 | 4/144 |
| C <sub>6</sub> -C <sub>5</sub> -C <sub>8</sub> | 109.752 | 4/144 |
| C <sub>5</sub> -C <sub>6</sub> -C <sub>2</sub> | 111.609 | 4/144 |
| C <sub>5</sub> -C <sub>6</sub> -C <sub>7</sub> | 114.927 | 4/144 |
| C <sub>2</sub> -C <sub>6</sub> -C <sub>7</sub> | 102.556 | 4/144 |
| C <sub>6</sub> -C <sub>7</sub> -C <sub>8</sub> | 118.173 | 8/144 |
| C <sub>6</sub> -C <sub>7</sub> -C <sub>4</sub> | 100.560 | 8/144 |
| C <sub>6</sub> -C <sub>7</sub> -C <sub>6</sub> | 108.875 | 4/144 |
| C <sub>4</sub> -C <sub>7</sub> -C <sub>8</sub> | 107.361 | 4/144 |
| C <sub>1</sub> -C <sub>8</sub> -C <sub>7</sub> | 114.168 | 4/144 |
| C <sub>1</sub> -C <sub>8</sub> -C <sub>5</sub> | 109.221 | 8/144 |
| C <sub>5</sub> -C <sub>8</sub> -C <sub>7</sub> | 108.254 | 8/144 |
| C <sub>5</sub> -C <sub>8</sub> -C <sub>5</sub> | 107.516 | 4/144 |

---
